# Supplementary material for: Concordance between tuberculin skin test and interferon-gamma release assay for latent tuberculosis screening in inflammatory bowel disease
Source: PubMed Central journal article supplement — Intest Res. 2020 Mar 20;18(3):306–14. doi: 10.5217/ir.2019.00116 (PMC7385575; doi:10.5217/ir.2019.00116), 2020-03-20
Supplement: ir-2019-00116-suppl1.pdf [file ir-2019-00116-suppl1.pdf]

See “Concordance between tuberculin skin test and interferon-gamma release assay for latent tuberculosis screening in inflammatory bowel disease” on page 1-9.

Supplementary Table 1. Search Strings

|    |                                                                                                                    |
|----|--------------------------------------------------------------------------------------------------------------------|
| 1  | exp Inflammatory Bowel Diseases/(68189)                                                                            |
| 2  | (coliti* or crohn*).tw,kf. (79012)                                                                                 |
| 3  | (inflammatory adj3 bowel*).tw,kf. (36289)                                                                          |
| 4  | IBD.tw,kf. (17049)                                                                                                 |
| 5  | or/1-4 (108300)                                                                                                    |
| 6  | Tuberculin Test/ (13105)                                                                                           |
| 7  | tuberculin.tw,kf. (14611)                                                                                          |
| 8  | ((mantoux or pirquet or tuberculum or tuberculosis) adj3 (injection* or reaction* or test or tests)).tw,kf. (3626) |
| 9  | (TST and (tuberculosis or tuberculin)).tw,kf. (1716)                                                               |
| 10 | or/6-9 (22022)                                                                                                     |
| 11 | 5 and 10 (138)                                                                                                     |
| 12 | Interferon-gamma Release Tests/ (881)                                                                              |
| 13 | Interferon-gamma/ (62399)                                                                                          |
| 14 | (interferon adj3 (release* or assay* or test or tests)).tw,kf. (3345)                                              |
| 15 | quantiferon.tw,kf. (1349)                                                                                          |
| 16 | ((tuberculosis or TB) adj3 gold).tw,kf. (1109)                                                                     |
| 17 | (gold adj2 tube).tw,kf. (729)                                                                                      |
| 18 | IGRA.tw,kf. (684)                                                                                                  |
| 19 | or/12-18 (65124)                                                                                                   |
| 20 | 11 and 19 (50)                                                                                                     |
| 21 | limit 20 to yr = "2011-Current" (41)                                                                               |
| 22 | remove duplicates from 20 (41)                                                                                     |

TST, immunosuppressive therapy; TB, tuberculosis; IGRA, interferon-gamma release assays.
