# Supplementary material for: Concordance between tuberculin skin test and interferon-gamma release assay for latent tuberculosis screening in inflammatory bowel disease
Source: PubMed Central journal article supplement — Intest Res. 2020 Mar 20;18(3):306–14. doi: 10.5217/ir.2019.00116 (PMC7385575; doi:10.5217/ir.2019.00116), 2020-03-20
Supplement: ir-2019-00116-suppl2.pdf [file ir-2019-00116-suppl2.pdf]

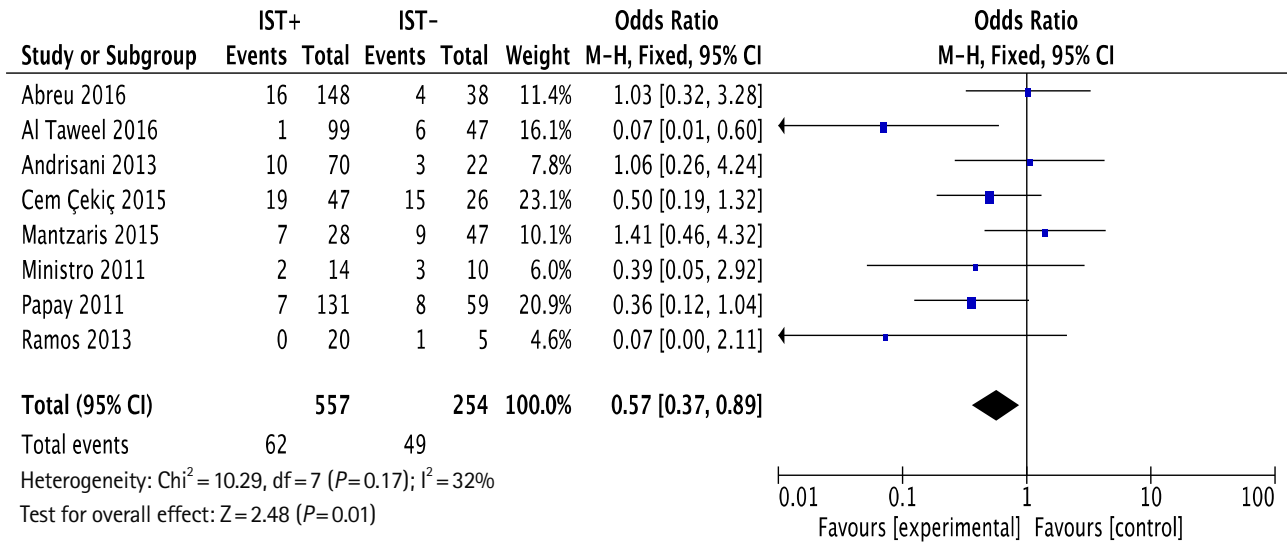

**Supplementary Fig. 1.** OR positive interferon-gamma release assays in immunosuppressed patients (IST+) compared to non-immunosuppressed (IST-) with fixed model. IST, immunosuppressive therapy; M-H, Mantel-Haenszel method.
